# Supplementary material
Source: MDPI journal article supplement (https://www.mdpi.com/2077-1312/10/3/303)
Supplement: s1 [file s1]

**Table S1.** List of bacterial isolates/strains and their accession numbers from GenBank used for the phylogenetic tree construction (Figure 6, Results).

| <b>Bacterial isolate</b>                      | <b>GenBank accession number</b> |
|-----------------------------------------------|---------------------------------|
| <i>Vibrio alginolyticus</i> strain SK2.2      | MT299659                        |
| <i>Vibrio kanaloae</i> strain TY-46           | MT505700                        |
| <i>Vibrio kanaloae</i> strain LMG 20539       | NR042468                        |
| <i>Vibrio toranzoniae</i> strain CH-102       | MH712997                        |
| <i>Vibrio anguillarum</i> ATCC 43311          | LC365683                        |
| <i>Vibrio harveyi</i> strain MFB03            | MT605241                        |
| <i>Vibrio splendidus</i> strain 7-31          | MN945371                        |
| <i>Vibrio neocaledonicus</i> strain CV(H)_2_3 | MH643633                        |
| <i>Vibrio cyclitrophicus</i> strain 6-5       | MN945434                        |
| <i>Vibrio gigantis</i> strain 3-20            | MN938218                        |
| <i>Vibrio europaeus</i> strain PP-638         | NR146051                        |
| <i>Vibrio crassostreae</i> strain 6-11        | MN945432                        |
| <i>Vibrio chagasii</i> isolate 8OM30          | LN832953                        |
| <i>Vibrio tubiashii</i> strain 2-46           | MT860486                        |
| <i>Vibrio fortis</i> strain U1sub2A           | KY229827                        |
